# Supplementary material for: Behavioral Abnormalities in Knockout and Humanized Tau Mice
Source: PubMed Central journal article supplement (PMC7080660; doi:10.3389/fendo.2020.00124), 2020-03-12
Supplement: Data_Sheet_1.pdf [file Data_Sheet_1.pdf]

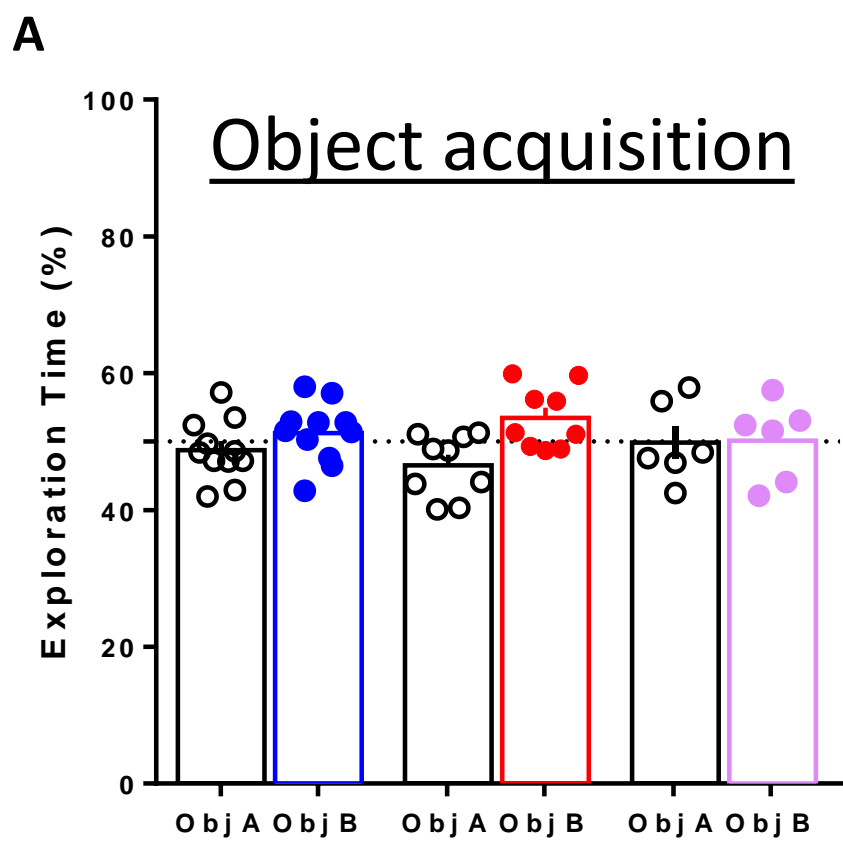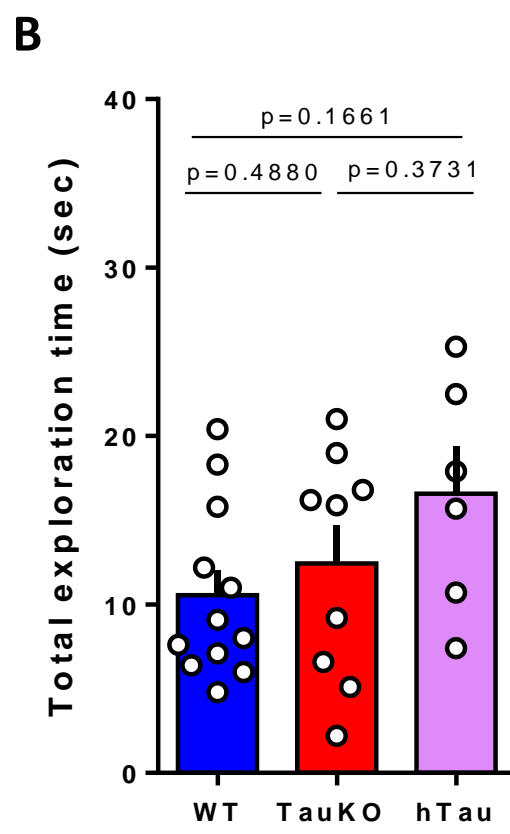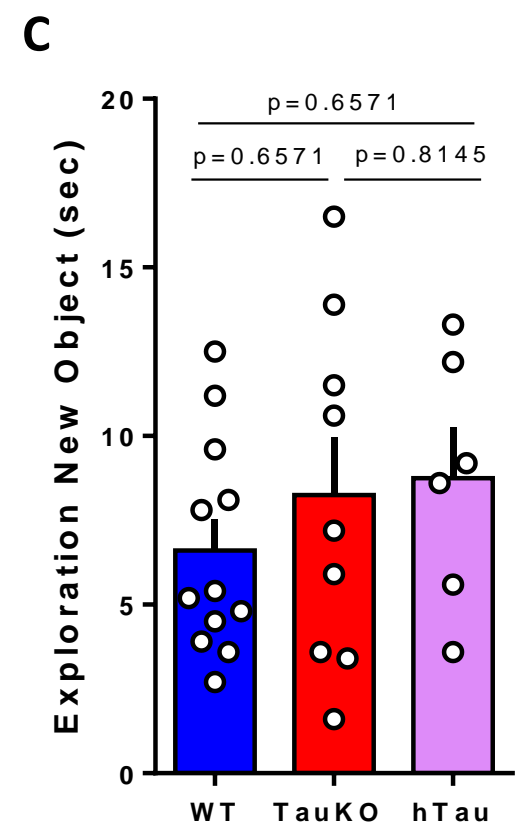

**SUPPLEMENTARY FIGURE 1. Novel Object Recognition test data**

Behavioral test performed with 15-19 weeks old WT, TauKO and hTau mice. **(A)** Exploration time of object A and B during the training phase showing no object preference. Time expressed in percentage. **(B)** Total exploration of familiar and novel objects during the test phase. Time expressed in seconds. **(C)** Total exploration of novel object during the test phase. Time expressed in seconds. Data are representative of at least two independent experiments.

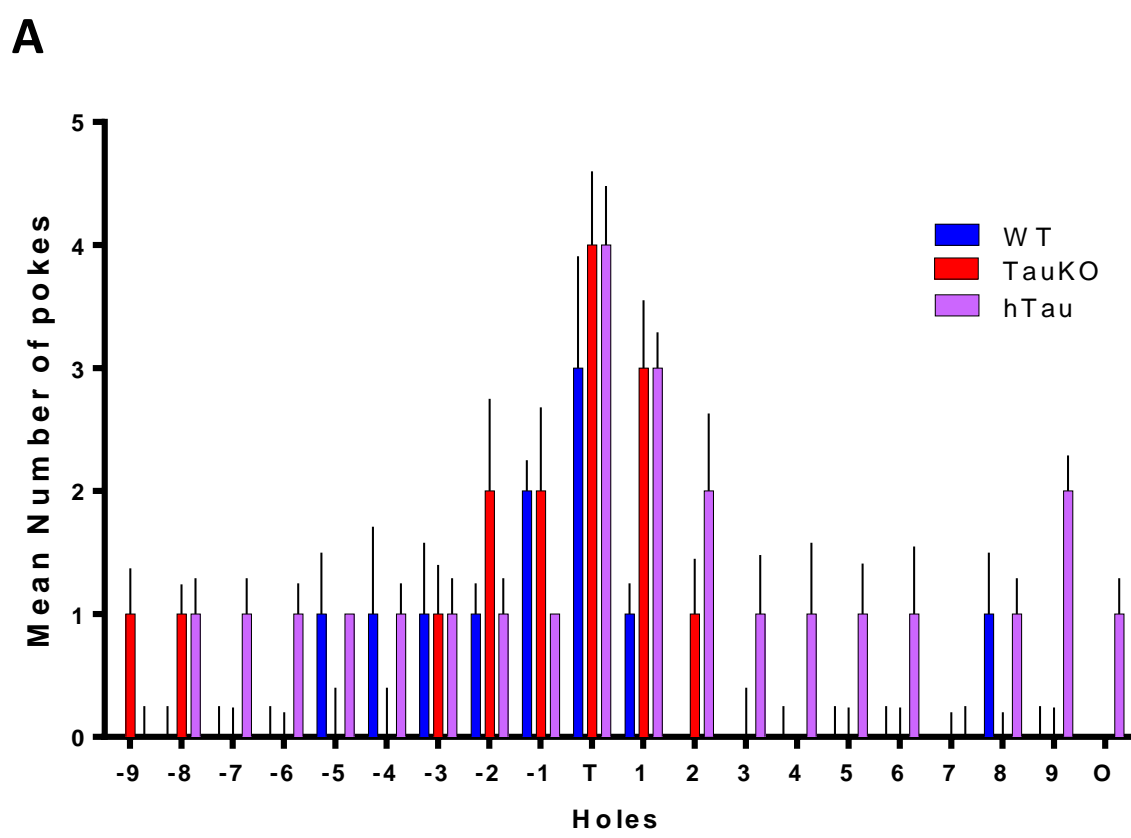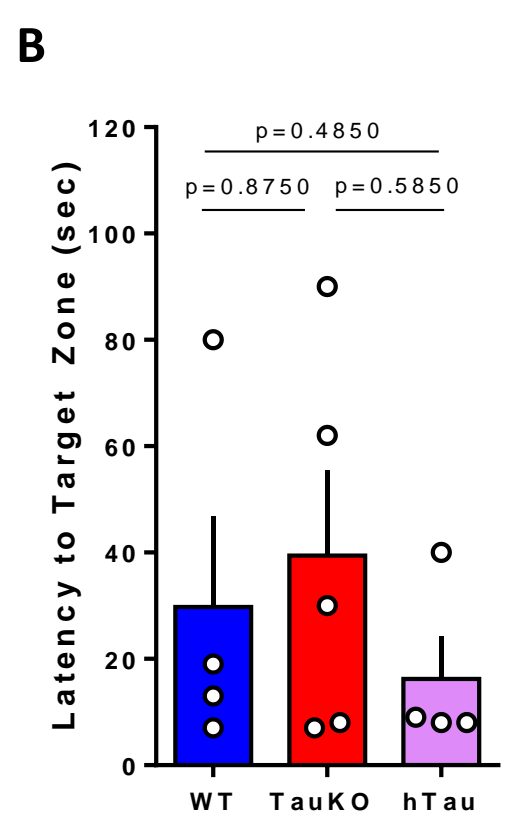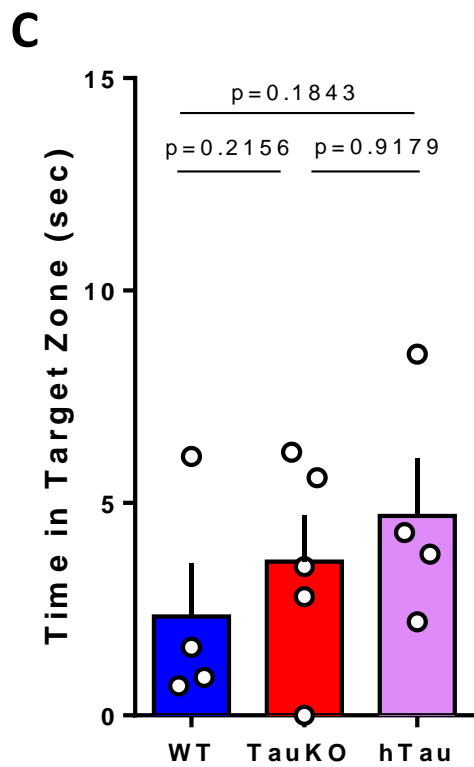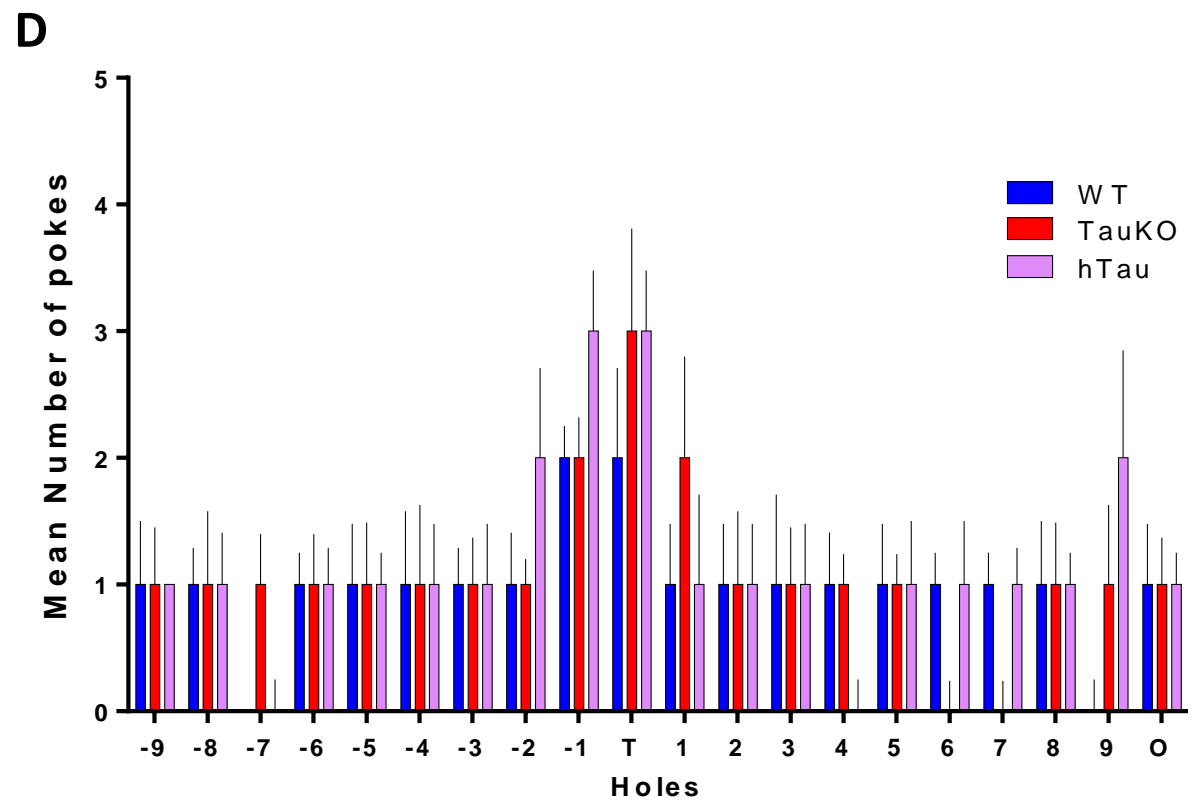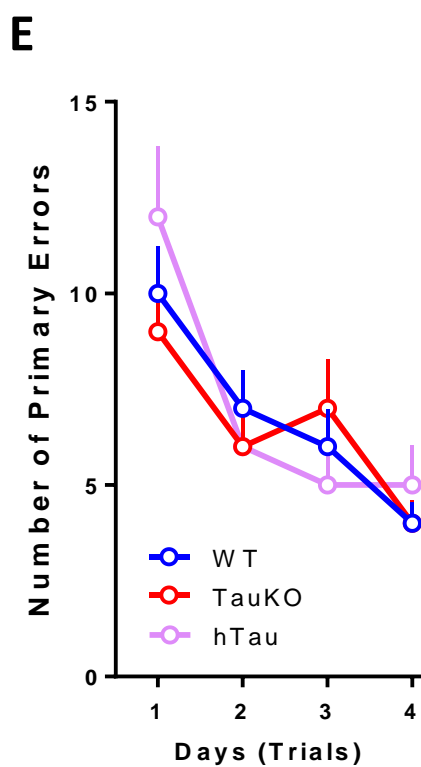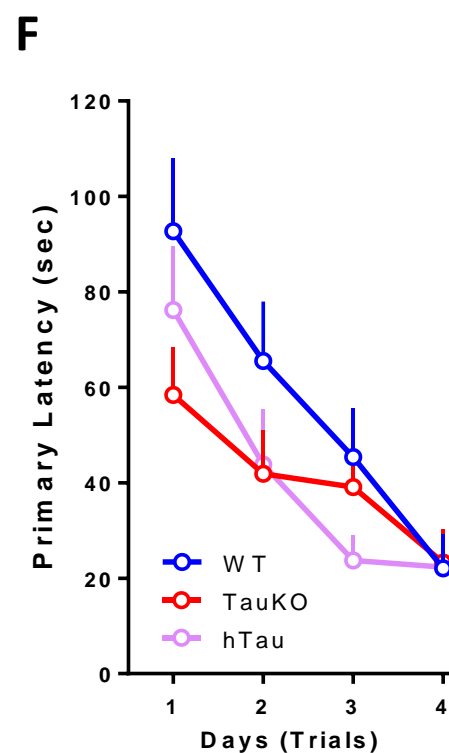

## SUPPLEMENTARY FIGURE 2. Barnes maze test data

Behavioral test performed with 15-19 weeks old WT, TauKO and hTau mice. **(A)** Histograms represent the mean number of nose pokes in each hole of the Barnes Maze during the test (Probe day 5, 24 hours after the last training trial). **(B-D)** Results from probe day 12, 8 days after the last training trial. **(B)** Latency to find and **(C)** time in the target zone. **(D)** Histograms represent the mean number of nose pokes in each hole of the Barnes Maze during the test (Probe day 12). **(E)** Number of primary errors and **(F)** primary latency to find the target zone in 4 different trials/day, for 4 days during the acquisition/training phase of the Barnes maze test. T: target hole, O: opposite hole to target. Data are representative of at least two independent experiments.
